# Supplementary material
Source: MDPI journal article supplement (https://www.mdpi.com/2076-3417/9/10/2095)
Supplement: s1 [file s1]

## Supplementary Information

### Engineering optogenetic control of endogenous p53 protein levels

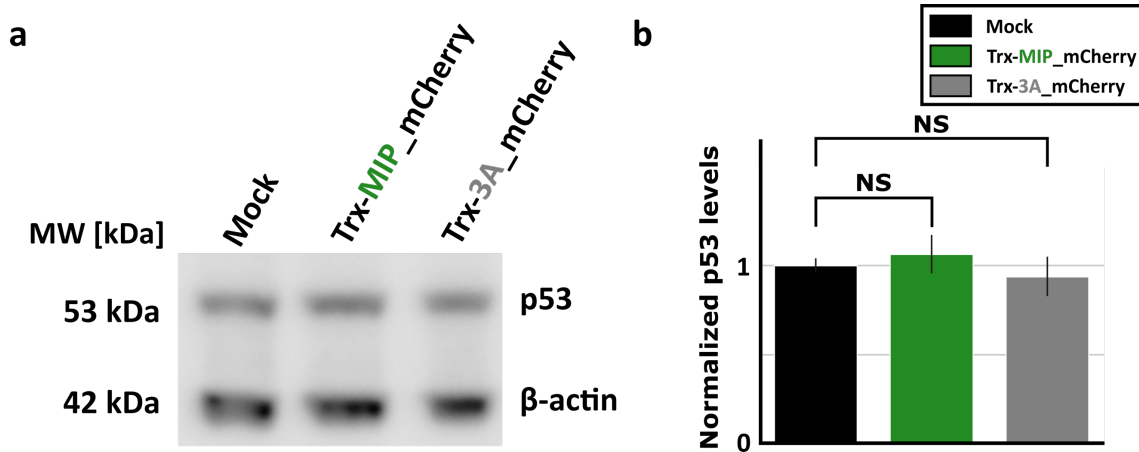

**Figure S1. The Mdm2-inhibitory peptide (MIP) does not lead to increased p53 levels in HCT116 cells.** (a) Western blot showing the levels of p53 in HCT116 cells transfected with the indicated constructs. Mock indicates cells transfected with empty pcDNA3.1(+).  $\beta$ -actin was used as loading control. (b) Bar plot showing the quantification of three independent western blots with samples as in (a). Data indicate mean  $\pm$  standard deviation. NS  $p \geq 0.05$ ,  $t$ -test.

**a**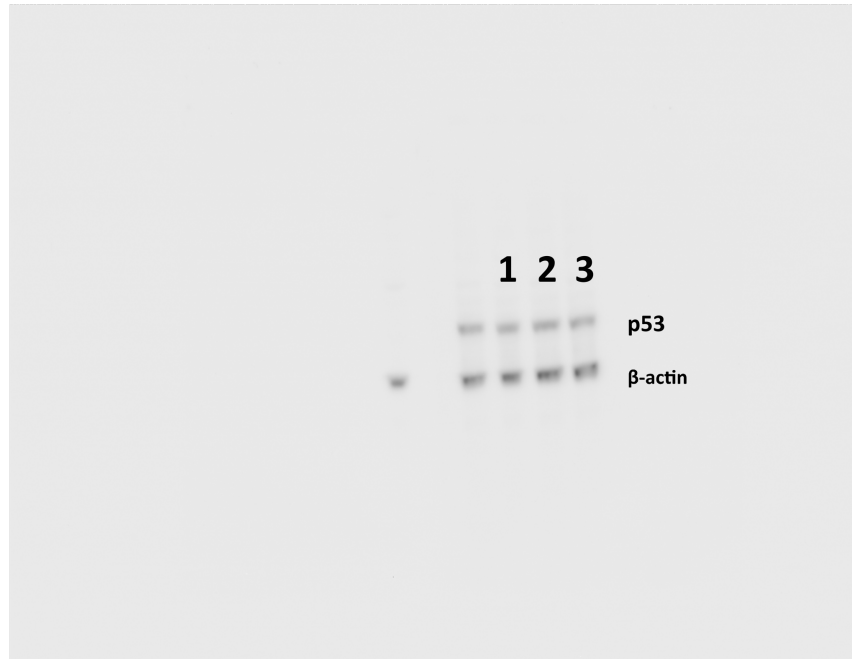

**Lane 1 - Replicate 1 - Trx-3a**  
**Lane 2 - Replicate 1 - Trx-MIP**  
**Lane 3 - Replicate 1 - Mock**

**b**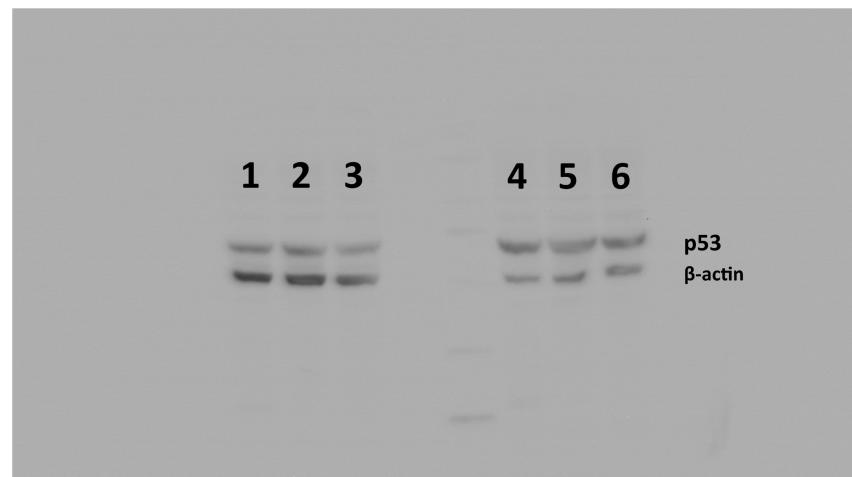

**Lane 1 - Replicate 2 - Mock**      **Lane 4 - Replicate 3 - Mock**  
**Lane 2 - Replicate 2 - Trx-MIP**      **Lane 5 - Replicate 3 - Trx-MIP**  
**Lane 3 - Replicate 2 - Trx-3a**      **Lane 6 - Replicate 3 - Trx-3a**

**Figure S2.** Raw data for the plot shown in Supplementary Figure S1. Only relevant lanes were annotated.

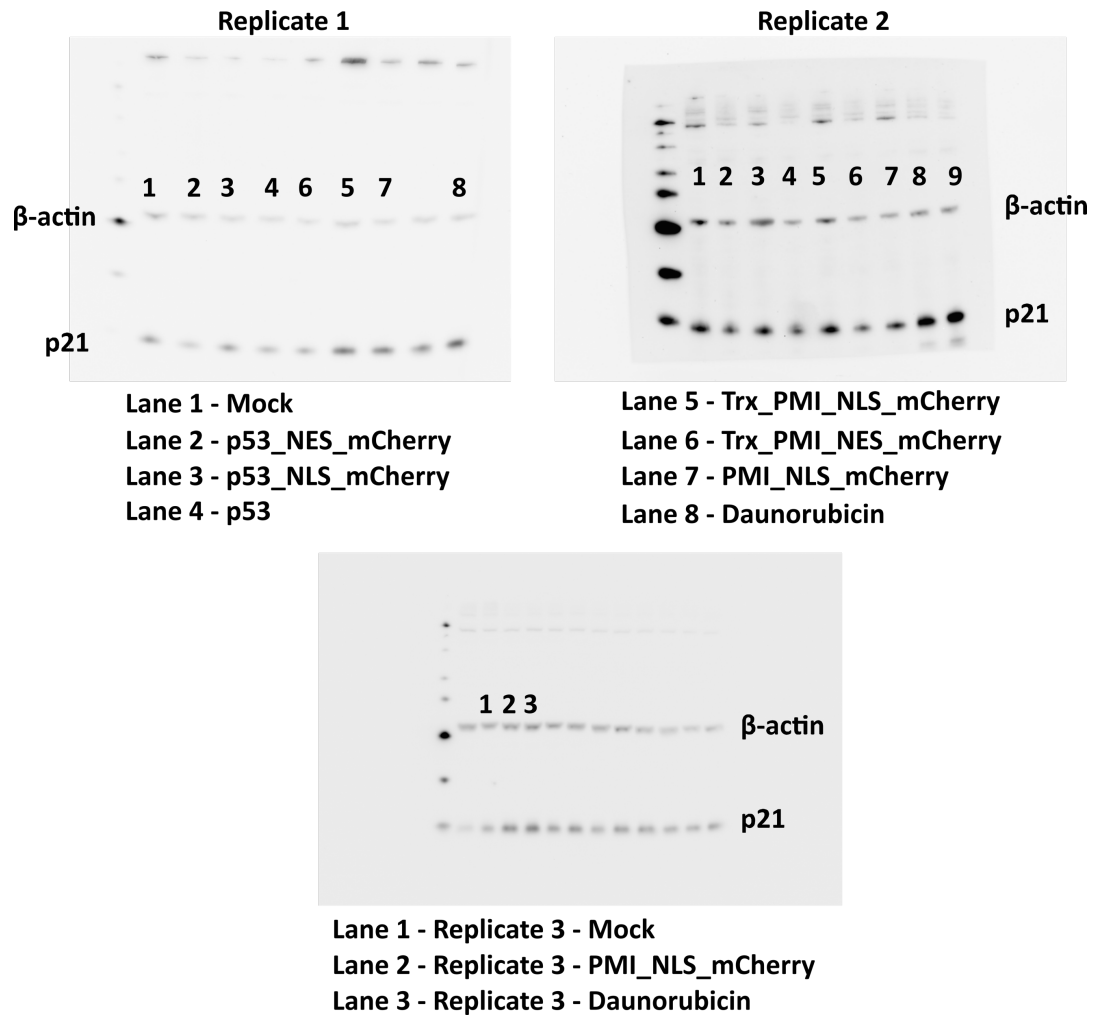

**Figure S3.** Raw data for the plot shown in Figure 1c. Only relevant lanes were annotated.

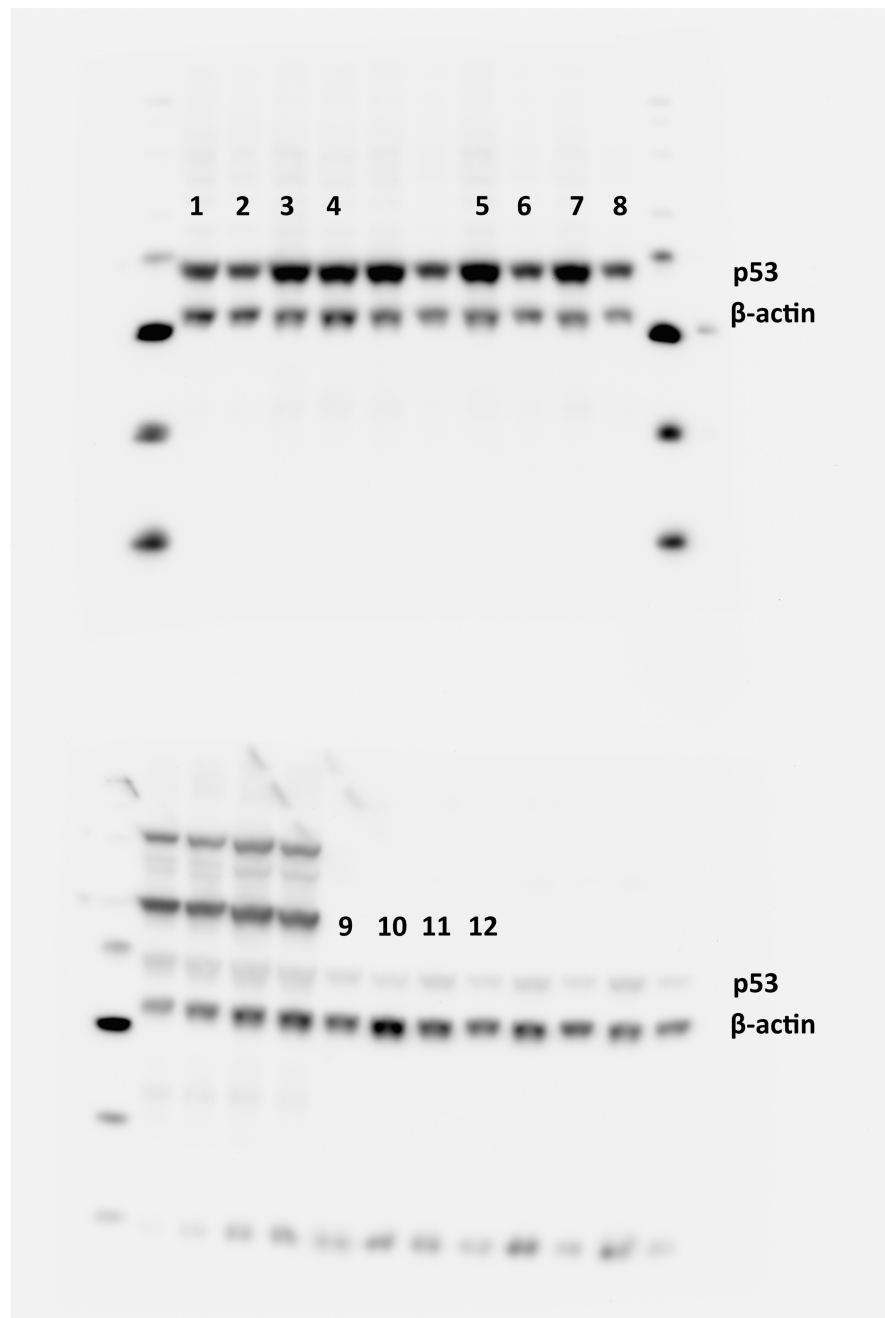

Lane 1 - Replicate 1 - mock - dark  
 Lane 2 - Replicate 1 - mock - light  
 Lane 3 - Replicate 2 - mock - dark  
 Lane 4 - Replicate 2 - mock - light  
 Lane 5 - Replicate 1 - PMI\_LEXY - dark  
 Lane 6 - Replicate 1 - PMI\_LEXY - light

Lane 7 - Replicate 2 - PMI\_LEXY - dark  
 Lane 8 - Replicate 2 - PMI\_LEXY - light  
 Lane 9 - Replicate 3 - mock - dark  
 Lane 10 - Replicate 3 - mock - light  
 Lane 11 - Replicate 3 - PMI\_LEXY - dark  
 Lane 12 - Replicate 3 - PMI\_LEXY - light

**Figure S4.** Raw data for the plot shown in Figure 3c. Only relevant lanes were annotated.

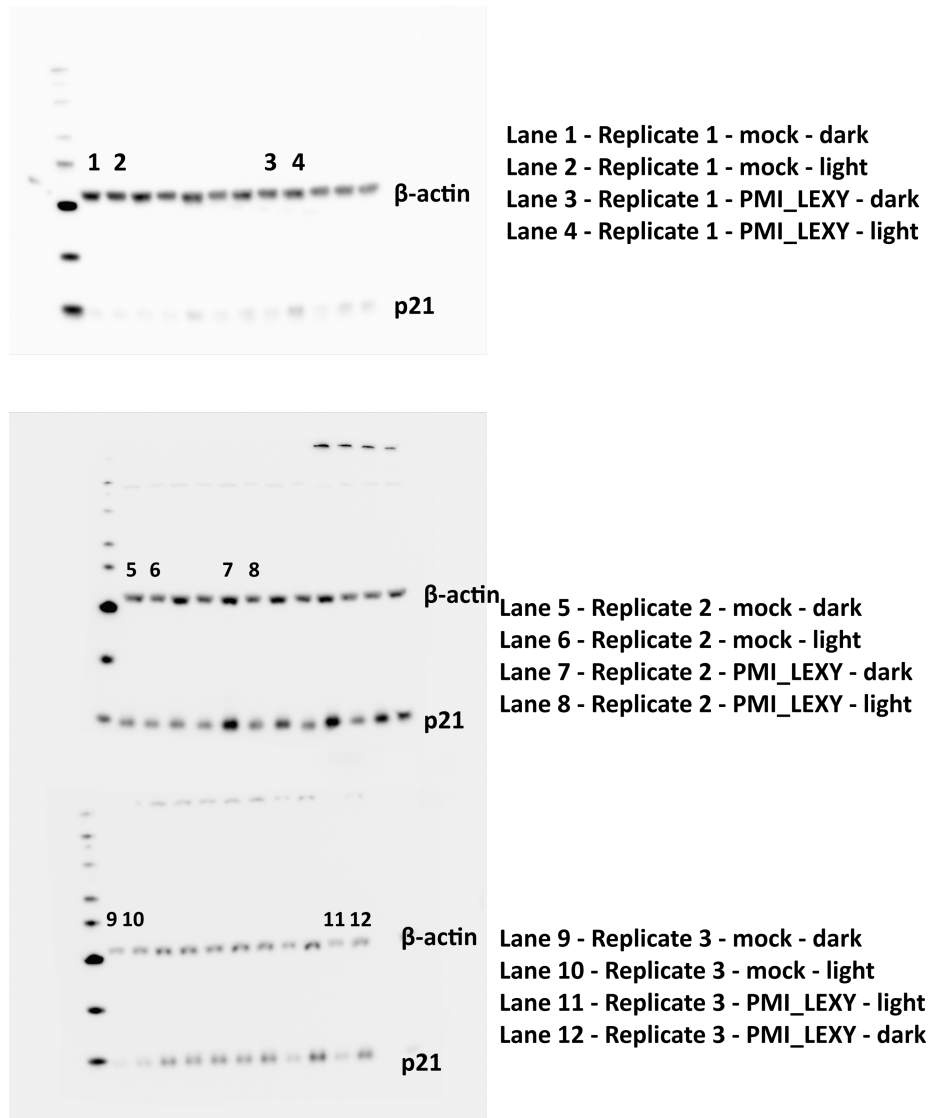

**Figure S5.** Raw data for the plot shown in Figure 3c. Only relevant lanes were annotated.
